# Supplementary material
Source: PubMed Central journal article supplement (PMC8283104)
Supplement: Appendix.pdf [file Appendix.pdf]

**Appendix: Coding Appendix****ICD-9-CM diagnosis codes**

---

|                                                        |                                                                                                                                                                                                                                                                                                                                                                                                                                                                                                                                                                                                                                                                                                                                                                                                                                                                                                                                                                                                                                                          |
|--------------------------------------------------------|----------------------------------------------------------------------------------------------------------------------------------------------------------------------------------------------------------------------------------------------------------------------------------------------------------------------------------------------------------------------------------------------------------------------------------------------------------------------------------------------------------------------------------------------------------------------------------------------------------------------------------------------------------------------------------------------------------------------------------------------------------------------------------------------------------------------------------------------------------------------------------------------------------------------------------------------------------------------------------------------------------------------------------------------------------|
| Amputation                                             | 885.x, 886.x, 887.x                                                                                                                                                                                                                                                                                                                                                                                                                                                                                                                                                                                                                                                                                                                                                                                                                                                                                                                                                                                                                                      |
| Open wounds                                            | 880.x, 881.x, 882.x, 883.x, 884.x, <i>except</i> 880.2, 881.2, 882.2, 883.2, 884.2<br>71101, 71102, 71103, 71104, 71111, 71112, 71113, 71114, 71121, 71122,<br>71123, 71124, 71131, 71132, 71133, 71134, 71141, 71142, 71143, 71144,<br>71151, 71152, 71153, 71154, 71161, 71162, 71163, 71164, 71171, 71172,<br>71173, 71174, 71181, 71182, 71183, 71184, 71191, 71192, 71193, 71194,<br>71211, 71212, 71213, 71214, 71221, 71222, 71223, 71224, 71231, 71232,<br>71233, 71234, 71281, 71282, 71283, 71284, 71291, 71292, 71293, 71294,<br>71501, 71502, 71503, 71504, 71511, 71512, 71513, 71514, 71521, 71522,<br>71523, 71524, 71531, 71532, 71533, 71534, 71581, 71582, 71583, 71584,<br>71591, 71592, 71593, 71594, 71601, 71602, 71603, 71604, 71611, 71612,<br>71613, 71614, 71621, 71622, 71623, 71624, 71631, 71632, 71633, 71634,<br>71641, 71642, 71643, 71644, 71651, 71652, 71653, 71654, 71661, 71662,<br>71663, 71664, 71681, 71682, 71683, 71684, 71691, 71692, 71693, 71694,<br>71801, 71802, 71803, 71804, 71901, 71902, 71903, 71904 |
| Arthropathy                                            |                                                                                                                                                                                                                                                                                                                                                                                                                                                                                                                                                                                                                                                                                                                                                                                                                                                                                                                                                                                                                                                          |
| Burns                                                  | 943.x, 944.x                                                                                                                                                                                                                                                                                                                                                                                                                                                                                                                                                                                                                                                                                                                                                                                                                                                                                                                                                                                                                                             |
| Frostbite                                              | 991.1                                                                                                                                                                                                                                                                                                                                                                                                                                                                                                                                                                                                                                                                                                                                                                                                                                                                                                                                                                                                                                                    |
| Contusion                                              | 923.x                                                                                                                                                                                                                                                                                                                                                                                                                                                                                                                                                                                                                                                                                                                                                                                                                                                                                                                                                                                                                                                    |
| Neuropathy                                             | 354.x                                                                                                                                                                                                                                                                                                                                                                                                                                                                                                                                                                                                                                                                                                                                                                                                                                                                                                                                                                                                                                                    |
| Fractures                                              | 812.x, 813.x, 814.x, 815.x, 816.x, 817.x, 818.x, 819.x                                                                                                                                                                                                                                                                                                                                                                                                                                                                                                                                                                                                                                                                                                                                                                                                                                                                                                                                                                                                   |
| Dislocations                                           | 832.x, 833.x, 834.x                                                                                                                                                                                                                                                                                                                                                                                                                                                                                                                                                                                                                                                                                                                                                                                                                                                                                                                                                                                                                                      |
| Sprains                                                | 840.x, 841.x, 842.x                                                                                                                                                                                                                                                                                                                                                                                                                                                                                                                                                                                                                                                                                                                                                                                                                                                                                                                                                                                                                                      |
| Arterial injuries                                      | 903.x                                                                                                                                                                                                                                                                                                                                                                                                                                                                                                                                                                                                                                                                                                                                                                                                                                                                                                                                                                                                                                                    |
| Superficial wounds (i.e., abrasions,<br>blisters, etc) | 912.x, 913.x, 914.x, 915.x                                                                                                                                                                                                                                                                                                                                                                                                                                                                                                                                                                                                                                                                                                                                                                                                                                                                                                                                                                                                                               |
| Crush injuries                                         | 927.x                                                                                                                                                                                                                                                                                                                                                                                                                                                                                                                                                                                                                                                                                                                                                                                                                                                                                                                                                                                                                                                    |
| Peripheral nerve injuries                              | 955.x                                                                                                                                                                                                                                                                                                                                                                                                                                                                                                                                                                                                                                                                                                                                                                                                                                                                                                                                                                                                                                                    |
| Tendon injuries                                        | 736.1, 736.2, 727.64, 905.8, 880.2, 881.2, 882.2, 883.2, 884.2                                                                                                                                                                                                                                                                                                                                                                                                                                                                                                                                                                                                                                                                                                                                                                                                                                                                                                                                                                                           |
| Infections                                             | 681.0, 680.3, 680.4, 682.3, 682.4, 730.02, 730.03, 730.04, 730.12, 730.13,<br>730.14                                                                                                                                                                                                                                                                                                                                                                                                                                                                                                                                                                                                                                                                                                                                                                                                                                                                                                                                                                     |
| Joint pain                                             | 719.41, 719.42, 719.43, 719.44                                                                                                                                                                                                                                                                                                                                                                                                                                                                                                                                                                                                                                                                                                                                                                                                                                                                                                                                                                                                                           |

---
